# Supplementary material for: Comparing multiscale, presence-only habitat suitability models created with structured survey data and community science data for a rare warbler species at the southern range margin
Source: PubMed Central journal article supplement (PMC10096272; doi:10.1371/journal.pone.0275556), 2023-04-12
Supplement: pone.0275556.s001.pdf [file pone.0275556.s001.pdf]

**Table S1. Data sources for landcover and topographic variables included in Golden-winged Warbler Maxent habitat distribution models.**

| Variable                          | Data Source                                                                                                                                                                                | Year(s)                            | Original Data Type   | Original Resolution |
|-----------------------------------|--------------------------------------------------------------------------------------------------------------------------------------------------------------------------------------------|------------------------------------|----------------------|---------------------|
| Forest height 0-10m within 150m   | LANDFIRE Existing Vegetation Height<br><a href="https://landfire.gov/evh.php">https://landfire.gov/evh.php</a>                                                                             | 2008, 2012, 2014                   | Categorical          | 30x30m              |
| Forest height 25-50m within 150m  | LANDFIRE Existing Vegetation Height<br><a href="https://landfire.gov/evh.php">https://landfire.gov/evh.php</a>                                                                             | 2008, 2012, 2014                   | Categorical          | 30x30m              |
| Road cover within 150m            | LANDFIRE Existing Vegetation Height<br><a href="https://landfire.gov/evh.php">https://landfire.gov/evh.php</a>                                                                             | 2001, 2008, 2012, 2014, 2016, 2020 | Categorical          | 30x30m              |
| Forest height 25-50m within 2500m | LANDFIRE Existing Vegetation Height<br><a href="https://landfire.gov/evh.php">https://landfire.gov/evh.php</a>                                                                             | 2008, 2012, 2014                   | Categorical          | 30x30m              |
| Road cover within 2500m           | LANDFIRE Existing Vegetation Height<br><a href="https://landfire.gov/evh.php">https://landfire.gov/evh.php</a>                                                                             | 2001, 2008, 2012, 2014, 2016, 2020 | Categorical          | 30x30m              |
| Agricultural land within 2500m    | LANDFIRE Existing Vegetation Height<br><a href="https://landfire.gov/evh.php">https://landfire.gov/evh.php</a>                                                                             | 2001, 2008, 2012, 2014, 2016, 2020 | Categorical          | 30x30m              |
| Developed land within 2500m       | LANDFIRE Existing Vegetation Height<br><a href="https://landfire.gov/evh.php">https://landfire.gov/evh.php</a>                                                                             | 2001, 2008, 2012, 2014, 2016, 2020 | Categorical          | 30x30m              |
| Herb and shrub cover within 150m  | Rangeland Analysis Platform Vegetation Cover V3<br><a href="http://rangeland.ntsg.umt.edu/data/rap/rap-vegetation-cover/">http://rangeland.ntsg.umt.edu/data/rap/rap-vegetation-cover/</a> | 2000-2020 (21 years)               | Continuous (Percent) | 30x30m              |
| Herb and shrub cover within 2500m | Rangeland Analysis Platform Vegetation Cover V3<br><a href="http://rangeland.ntsg.umt.edu/data/rap/rap-vegetation-cover/">http://rangeland.ntsg.umt.edu/data/rap/rap-vegetation-cover/</a> | 2000-2020 (21 years)               | Continuous (Percent) | 30x30m              |
| Canopy cover within 150m          | NLCD USFS Canopy Cover<br><a href="https://www.mrlc.gov/data">https://www.mrlc.gov/data</a>                                                                                                | 2011, 2016                         | Continuous (Percent) | 30x30m              |
| Canopy cover within 2500m         | NLCD USFS Canopy Cover<br><a href="https://www.mrlc.gov/data">https://www.mrlc.gov/data</a>                                                                                                | 2011, 2016                         | Continuous (Percent) | 30x30m              |
| Elevation                         | ASTER Global DEM V3<br><a href="https://earthexplorer.usgs.gov/">https://earthexplorer.usgs.gov/</a>                                                                                       | 2019                               | Continuous (Percent) | 30x30m              |
| Slope                             | ASTER Global DEM V3<br><a href="https://earthexplorer.usgs.gov/">https://earthexplorer.usgs.gov/</a>                                                                                       | 2019                               | Continuous (Percent) | 30x30m              |
| Aspect                            | ASTER Global Digital Elevation Model V3<br><a href="https://earthexplorer.usgs.gov/">https://earthexplorer.usgs.gov/</a>                                                                   | 2019                               | Continuous (Percent) | 30x30m              |
