# Supplementary material for: Comparing multiscale, presence-only habitat suitability models created with structured survey data and community science data for a rare warbler species at the southern range margin
Source: PubMed Central journal article supplement (PMC10096272; doi:10.1371/journal.pone.0275556), 2023-04-12
Supplement: pone.0275556.s002.pdf [file pone.0275556.s002.pdf]

**Table S2. Ecological niche description including mean values ( $\pm$  standard deviation) for all variables included in Maxent models.**

| <b>Variable</b>                   | <b>Audubon</b>     | <b>eBird</b>      | <b>Background</b> |
|-----------------------------------|--------------------|-------------------|-------------------|
| Forest height 0-10m within 150m   | 0.02 $\pm$ 0.04    | 0.02 $\pm$ 0.04   | 0.008 $\pm$ 0.03  |
| Forest height 25-50m within 150m  | 0.14 $\pm$ 0.14    | 0.08 $\pm$ 0.12   | 0.21 $\pm$ 0.18   |
| Road cover within 150m            | 0.05 $\pm$ 0.06    | 0.08 $\pm$ 0.09   | 0.03 $\pm$ 0.06   |
| Forest height 25-50m within 2500m | 0.24 $\pm$ 0.07    | 0.22 $\pm$ 0.08   | 0.25 $\pm$ 0.10   |
| Agricultural land within 2500m    | 0.001 $\pm$ 0.002  | 0.002 $\pm$ 0.006 | 0.003 $\pm$ 0.007 |
| Developed land within 2500m       | 0.0008 $\pm$ 0.002 | 0.005 $\pm$ 0.02  | 0.004 $\pm$ 0.01  |
| Herb and shrub cover within 150m  | 0.16 $\pm$ 0.16    | 0.17 $\pm$ 0.17   | 0.10 $\pm$ 0.15   |
| Herb and shrub cover within 2500m | 0.10 $\pm$ 0.06    | 0.10 $\pm$ 0.06   | 0.10 $\pm$ 0.08   |
| Elevation                         | 1097 $\pm$ 186     | 1128 $\pm$ 302    | 968 $\pm$ 250     |
| Slope                             | 14.6 $\pm$ 7.0     | 12.8 $\pm$ 6.2    | 16.6 $\pm$ 8.5    |
| Aspect                            | 3.0 $\pm$ 1.8      | 3.2 $\pm$ 1.7     | 3.2 $\pm$ 1.8     |
